# Supplementary material
Source: PubMed Central journal article supplement (PMC3809035)
Supplement: NIHMS463637-supplement-supplementdata.pdf [file NIHMS463637-supplement-supplementdata.pdf]

**a**

|                                  |                                  |                                  |
|----------------------------------|----------------------------------|----------------------------------|
| <b>DAPI</b>                      | <b>Pref-1</b>                    | <b>Pref-1</b>                    |
| <b>Pref-1</b>                    | <b>C/EBP <math>\alpha</math></b> | <b>C/EBP <math>\alpha</math></b> |
| <b>C/EBP <math>\alpha</math></b> | <b>CD31</b>                      | <b>CD31</b>                      |
| <b>CD31</b>                      |                                  |                                  |

**adipocytes (C/EBP $\alpha$ <sup>+</sup>Pref-1<sup>-</sup>)**

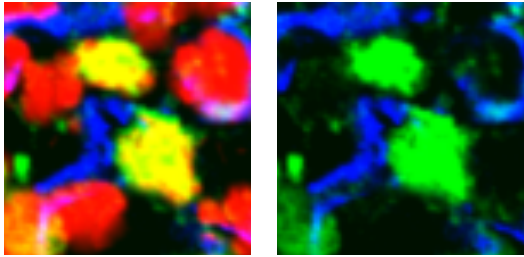

**pre-adipocyte (C/EBP $\alpha$ -Pref-1<sup>+</sup>)**

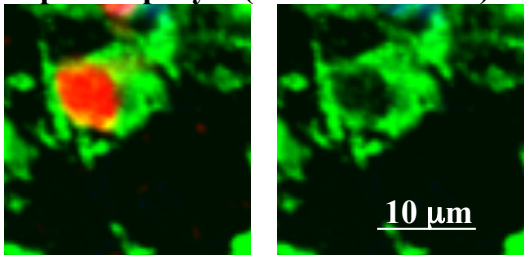

**b**

|               |            |             |
|---------------|------------|-------------|
| <b>Lyve-1</b> | <b>CD4</b> | <b>CD31</b> |
|---------------|------------|-------------|

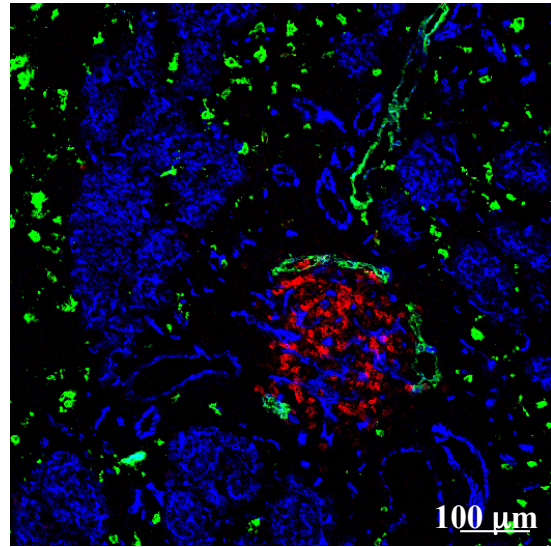

**c**

**E18 inguinal fat pad adipocyte cluster**

|                                  |                  |
|----------------------------------|------------------|
| <b>DAPI</b>                      | <b>CD31</b>      |
| <b>C/EBP <math>\alpha</math></b> | <b>Perilipin</b> |

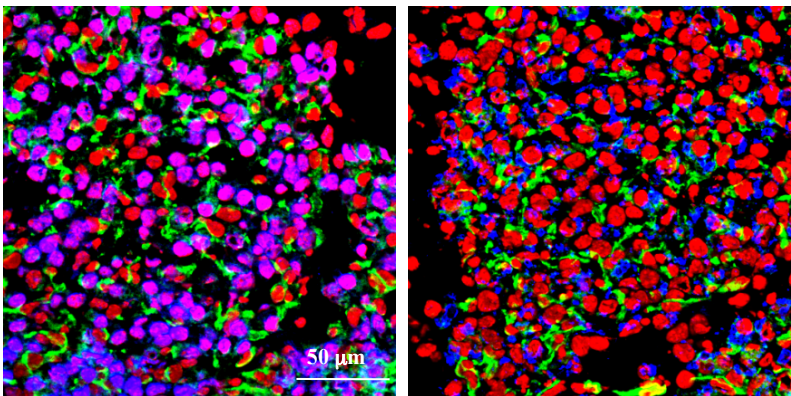

E18 inguinal LN

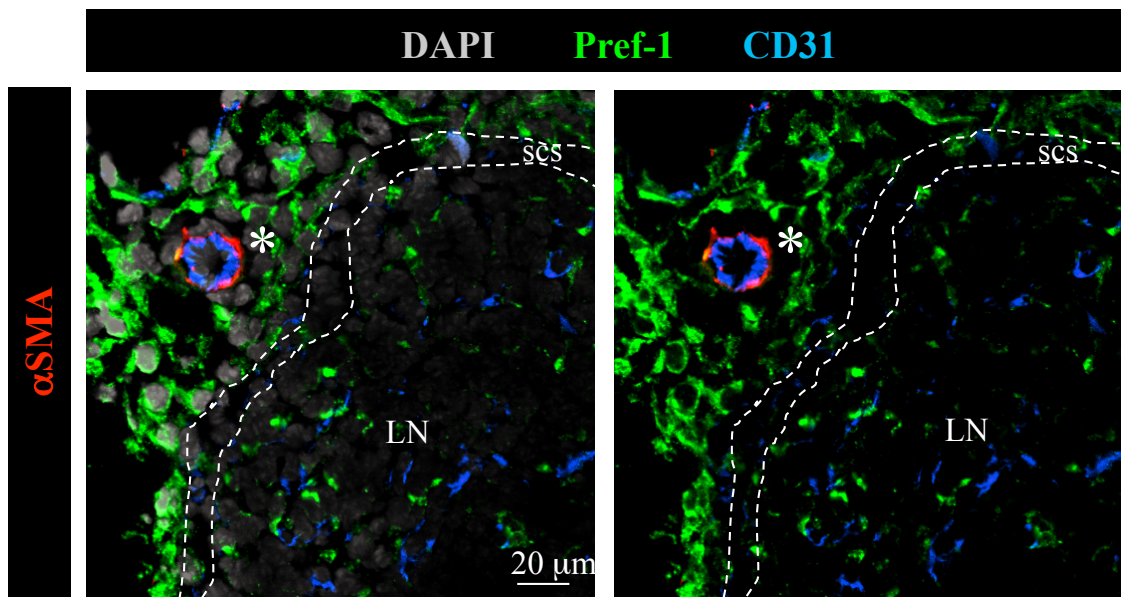

E18 inguinal LN: LTi cells (CD4<sup>+</sup>) and LTo cells (Pref-1<sup>+</sup>MAdCAM-1<sup>+</sup>)

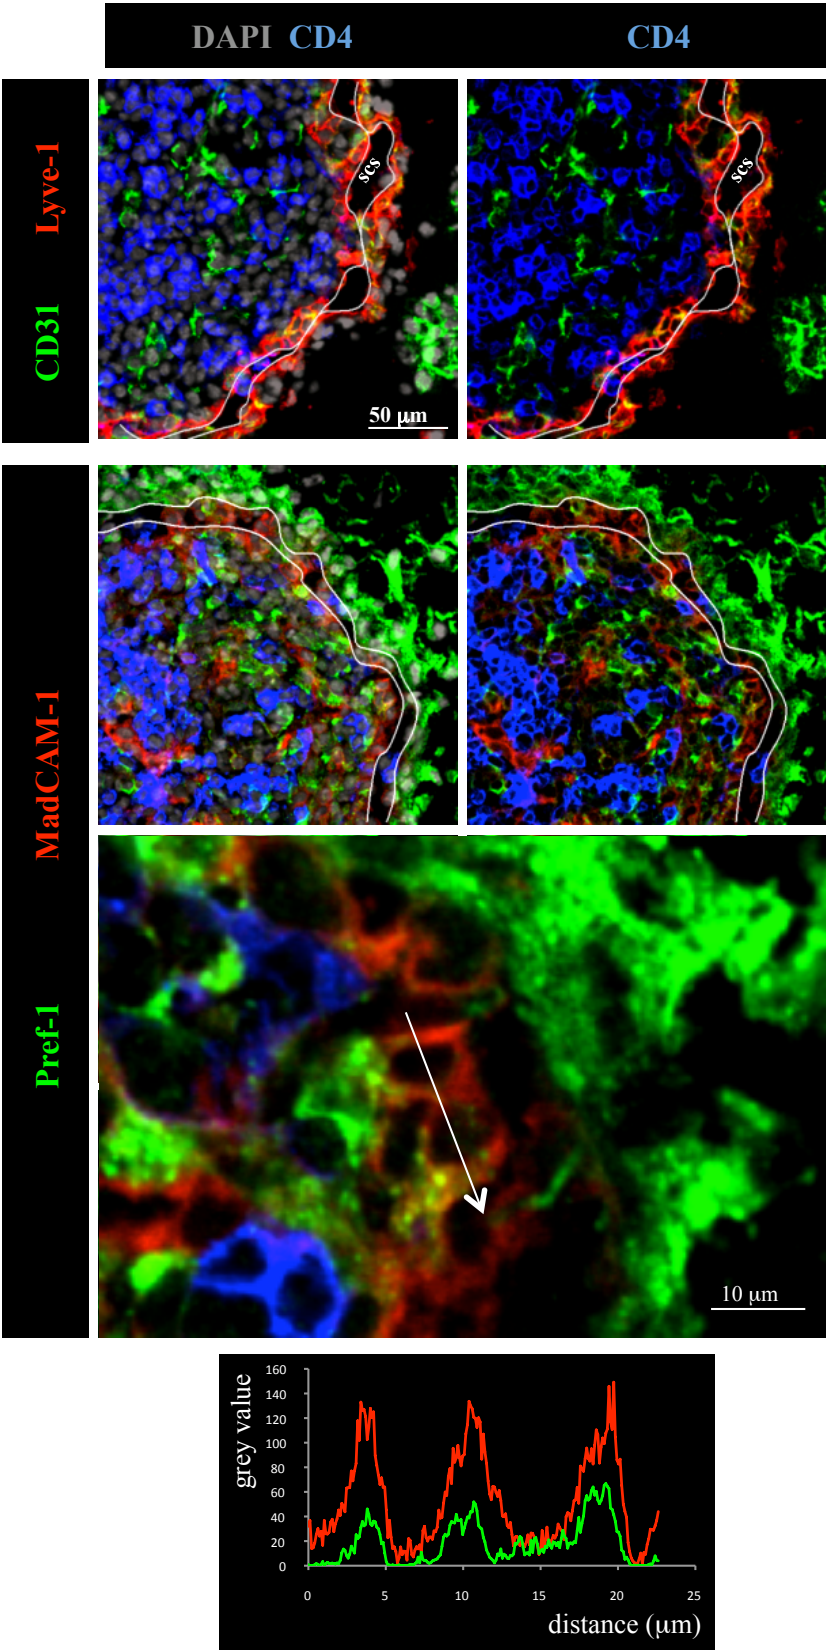

Supplementary Figure 3

## E18 fat pads

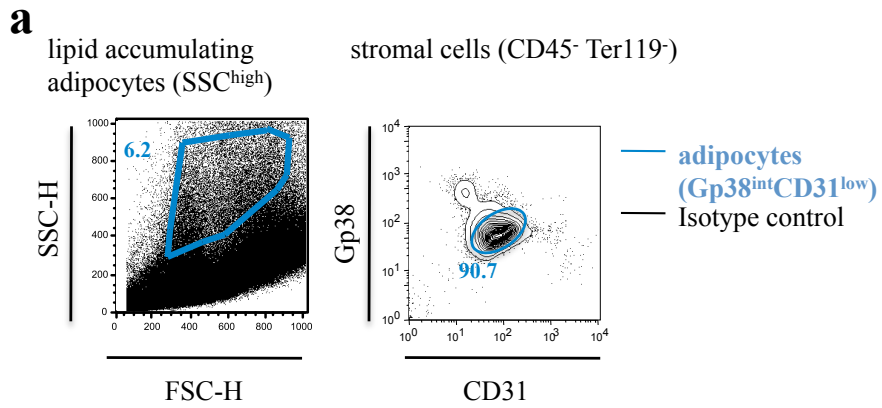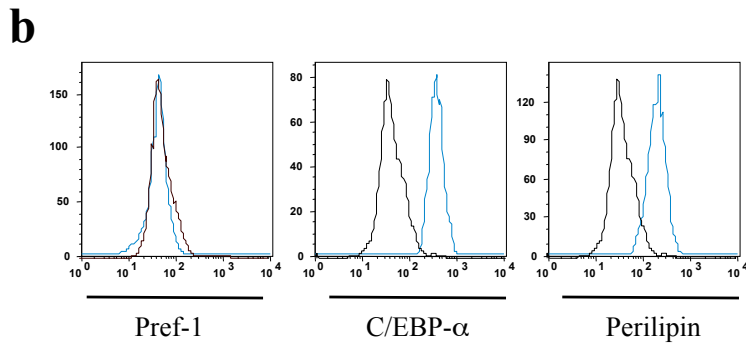

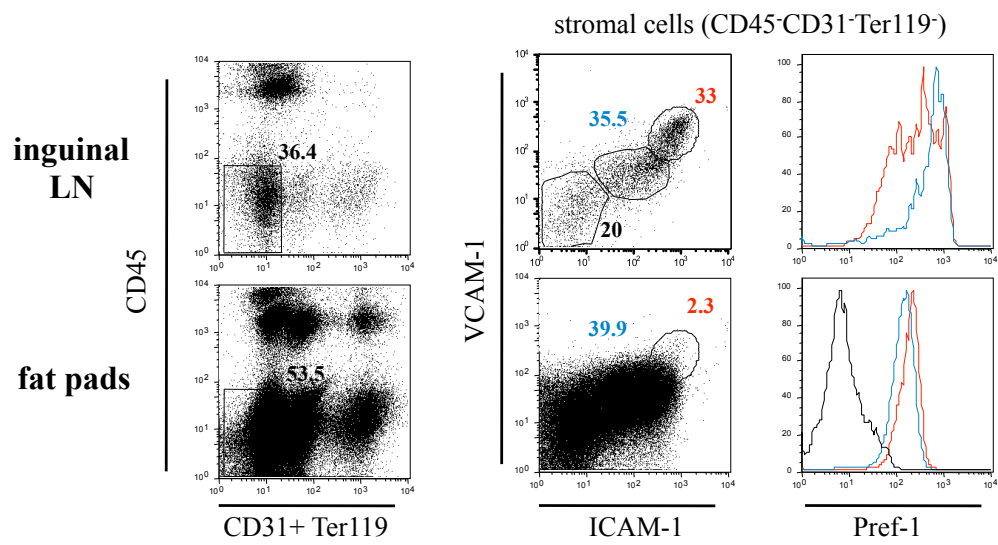

- Immature LN stromal cells (ICAM-1<sup>int</sup>VCAM-1<sup>int</sup>)
- LTo cells (ICAM-1<sup>high</sup>VCAM-1<sup>high</sup>)
- Isotype control

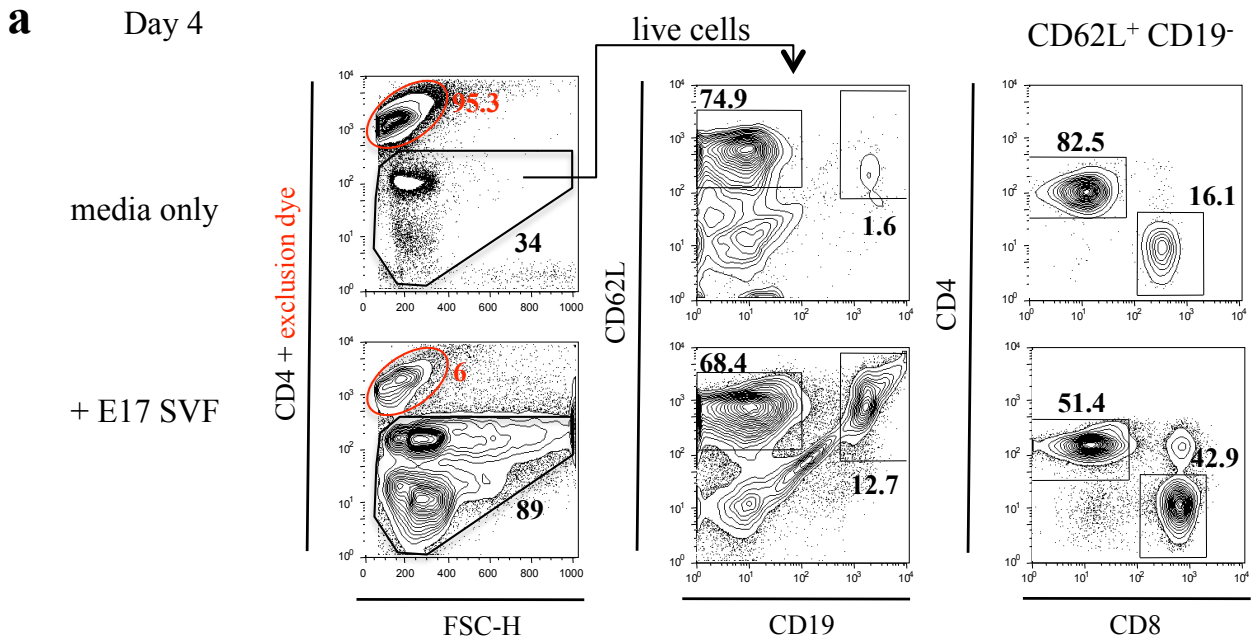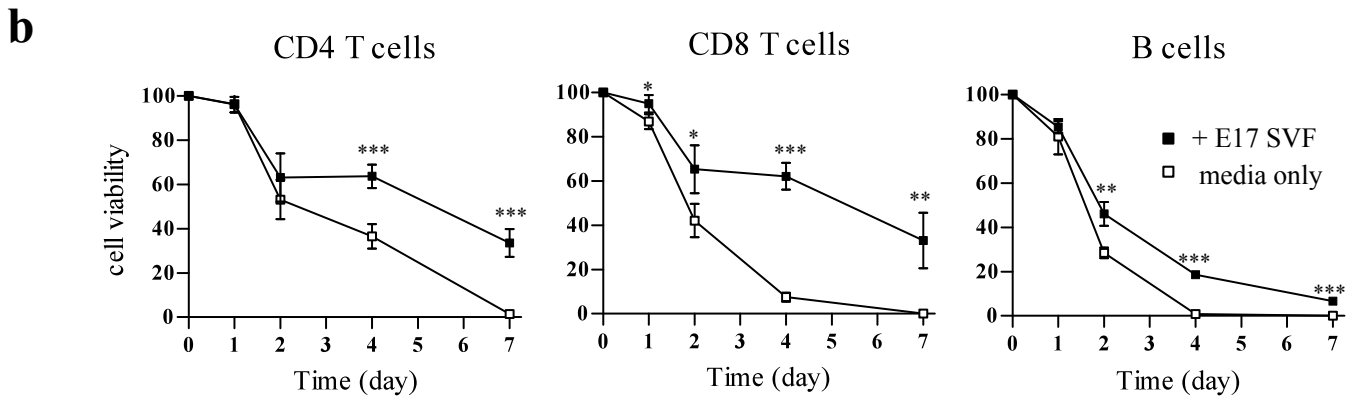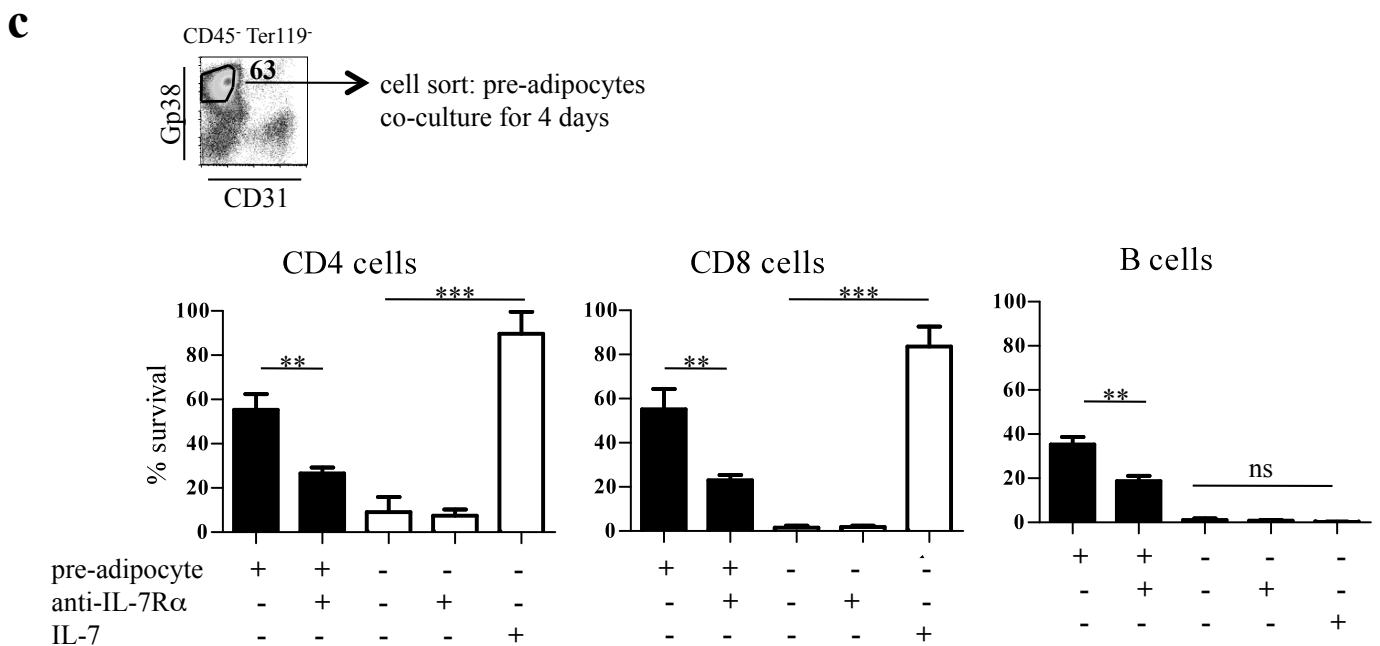

Supplementary Figure 6

## Adult SVF

**a**

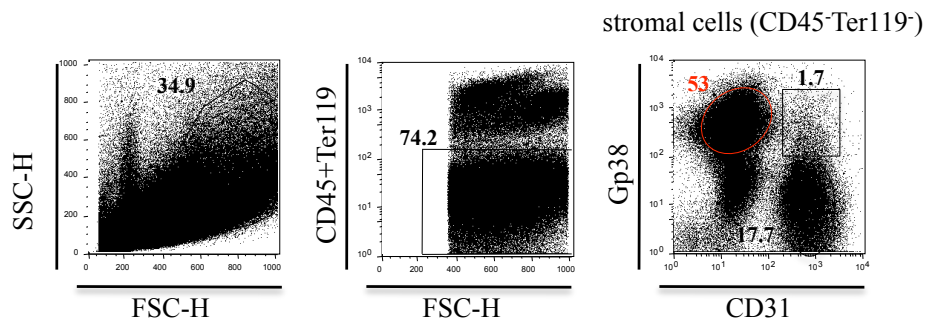

**b**

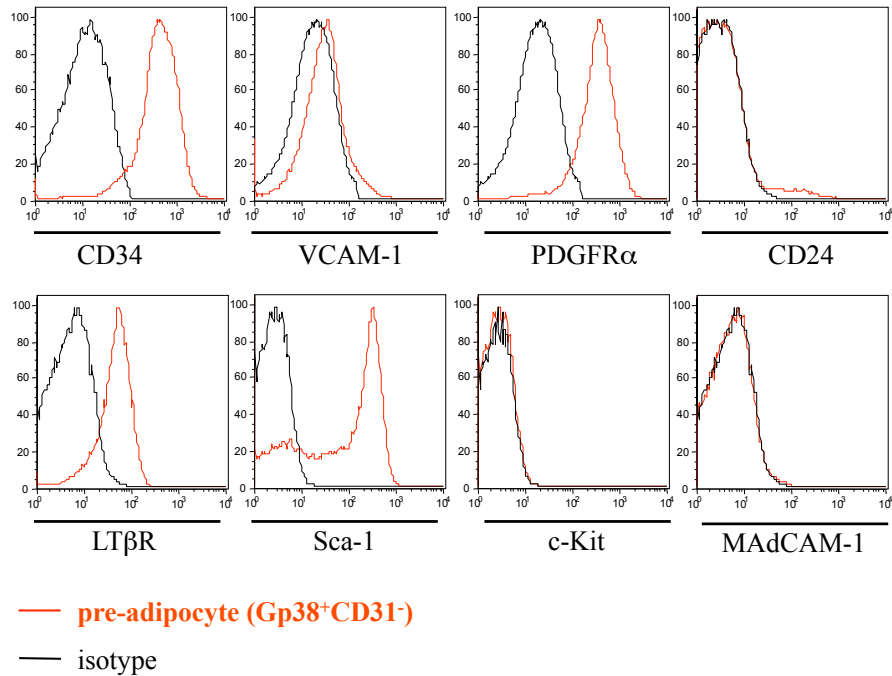

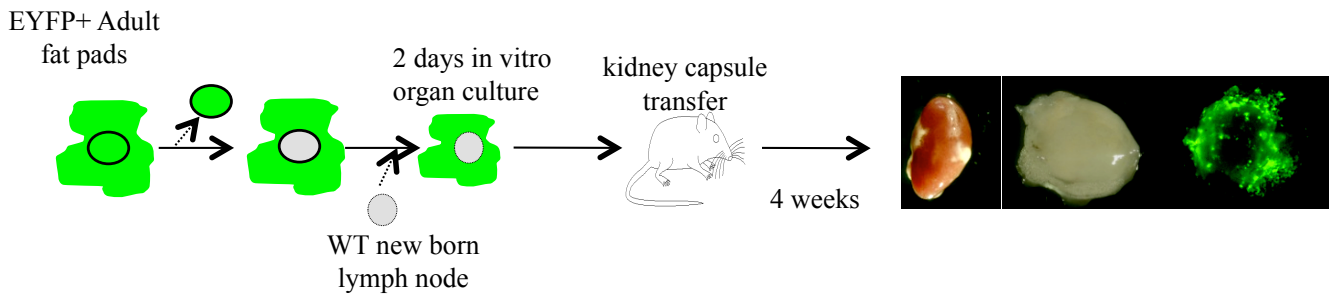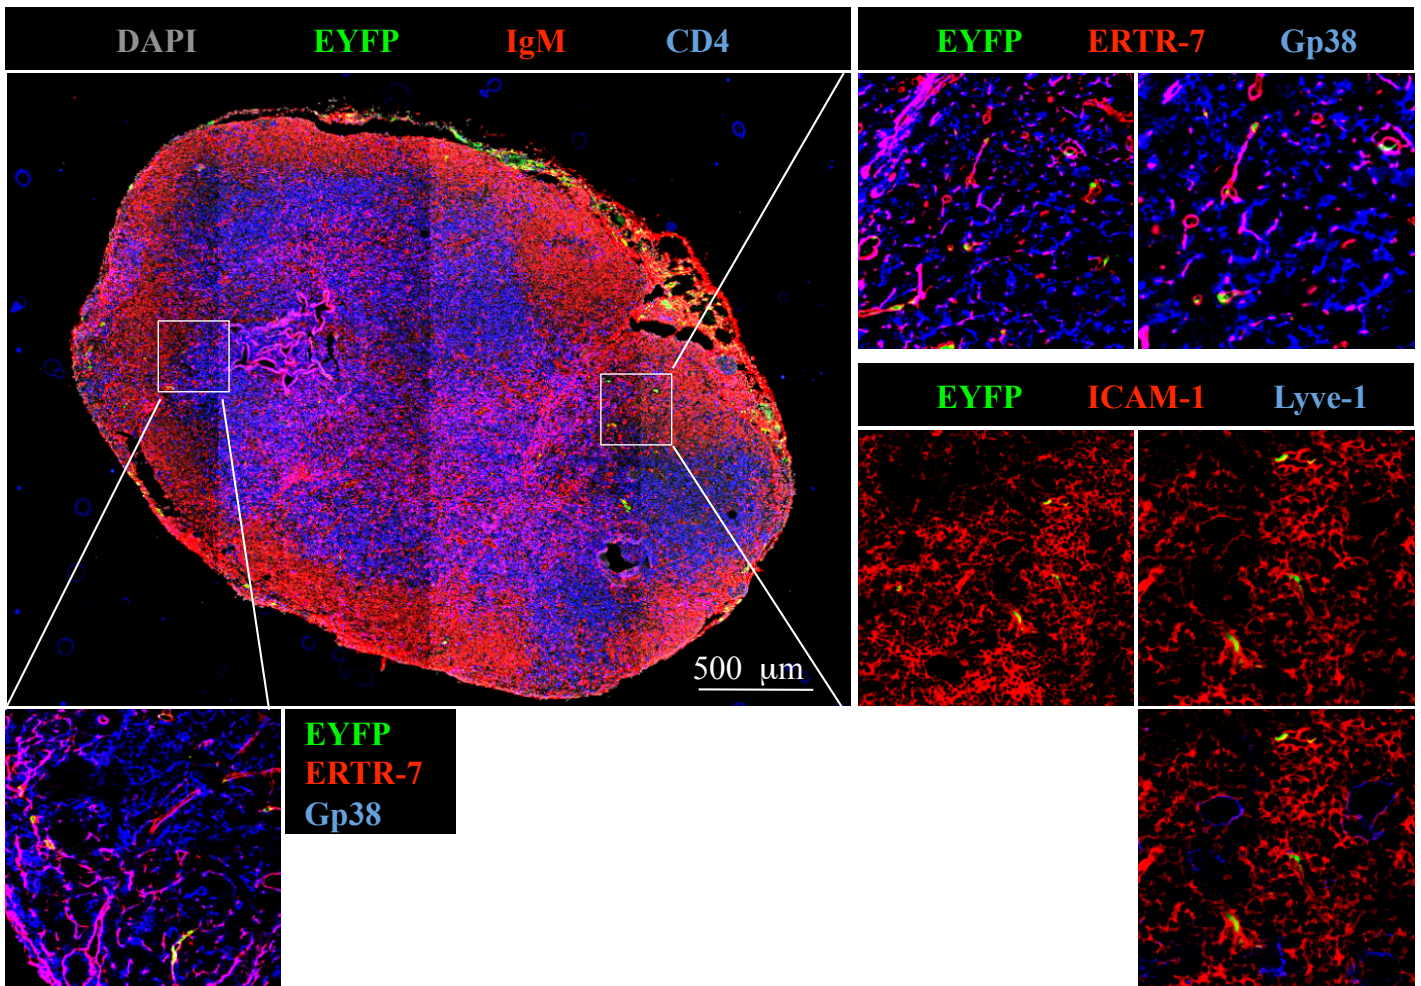

Supplementary Figure 8



|                                 | Forward                  | Reverse                   |
|---------------------------------|--------------------------|---------------------------|
| <i>Hprt</i>                     | CCAGCGTCGTGATTAGCGATG    | ATAGCCCCCCTTGAGCACACAG    |
| <i>Ppar<math>\gamma</math>1</i> | CCACCAACTTCGGAATCAGCT    | TTTGTGGATCCGGCAGTTAAGA    |
| <i>Ppar<math>\gamma</math>2</i> | ATGGGTGAAACTCTGGGAGATTCT | CTTGGAGCTTCAGGTCATATTTGTA |
| <i>Ppara<math>\alpha</math></i> | GCGTACGGCAATGGCTTTAT     | GAACGGCTTCCTCAGGTTCTT     |
| <i>Adiponectin</i>              | AAGAAGGACAAGGCCGTTCTCTT  | GCTATGGGTAGTTGCAGTCAGTT   |
| <i>Resistin</i>                 | CTGTCCAGTCTATCCTTGCACAC  | CAGAAGGCACAGCAGTCTTGA     |
| <i>Cxcl13</i>                   | CATAGATCGGATTCAAGTTACGCC | TCTTGGTCCAGATCACAACCTCA   |
| <i>Ccl19</i>                    | CCTTAGTGTGGTGAACACAACA   | GGGGTCTAATGATGCGGAA       |
| <i>Il-7</i>                     | TTCCTCCACTGATCCTTGTCT    | AGCAGCTTCCTTTGTATCATCAC   |
